# Supplementary material
Source: MDPI journal article supplement (https://www.mdpi.com/2071-1050/12/12/4810)
Supplement: s1 [file s1]

**Supplementary Materials:** The following are available online at [www.mdpi.com/xxx/s1](http://www.mdpi.com/xxx/s1), Table S1: List of studies included in the systematic literature review (in alphabetic order), Table S2: Factors/variables used in word cloud visualization.

**Table S1.** List of studies included in the systematic literature review.

1. Ahmad, Z.; Hashim, R. Customer's Brand Equity and Customer Loyalty: A study on Hotel's Conference Market. *World Appl. Sci. J.* **2011**, *12*, 44–49.
2. Al-Msallam, S. Customer Satisfaction and Brand Loyalty in the Hotel Industry. *Int. J. Manag. Sci. Bus. Res.* **2015**, *4*, 1857–7881.
3. Alnawas, I.; Altarifi, S. Exploring the role of brand identification and brand love in generating higher levels of brand loyalty. *J. Vacat. Mark.* **2015**, *22*, 111–128, <https://doi.org/10.1177/1356766715604663>
4. Back, K.-J. The Effects of Image Congruence on Customers' Brand Loyalty in the Upper Middle-Class Hotel Industry. *J. Hosp. Tour. Res.* **2005**, *29*, 448–467, <https://doi.org/10.1177/1096348005276497>
5. Callarisa, L.; García, J.S.; Cardiff, J.; Roshchina, A. Harnessing social media platforms to measure customer-based hotel brand equity. *Tour. Manag. Perspect.* **2012**, *4*, 73–79, <https://doi.org/https://doi.org/10.1016/j.tmp.2012.04.005>
6. Hosseini, R.S.; Zainal, A.; Sumarjan, N. The Effects of Service Performance of Hotel Customers on Quality of Experience and Brand Loyalty in Iran. *Procedia - Soc. Behav. Sci.* **2015**, *201*, 156–164, <https://doi.org/https://doi.org/10.1016/j.sbspro.2015.08.163>.
7. Ibrahim, B.; Aljarah, A. Dataset of relationships among social media marketing activities, brand loyalty, revisit intention. Evidence from the hospitality industry in Northern Cyprus. *Data Br.* **2018**, *21*, 1823–1828, <https://doi.org/10.1016/j.dib.2018.11.024>.
8. Kayaman, R.; Arasli, H. Customer based brand equity: Evidence from the hotel industry. *Manag. Serv. Qual.* **2007**, *17*, 92–109, <https://doi.org/10.1108/09604520710720692>.
9. Kim, H.-B.; Kim, W.G. The relationship between brand equity and firms' performance in luxury hotels and chain restaurants. *Tour. Manag.* **2005**, *26*, 549–560, <https://doi.org/10.1016/j.tourman.2004.03.010>.
10. Kim, W.; Kim, H. Determinants of Mid-scale Hotel Brand Equity. *Hosp. Rev.* **2007**, *25*, 61–70, <http://digitalcommons.fiu.edu/hospitalityreview/vol25/iss1/7>
11. Ko, C. Exploring the Relationship of Different Components of Brand Equity in Hotel Industry Through Social. *Int. J. Organ. Innov.* **2017**, *9*, 47–56.
12. Liu, C.-H.; Jiang, J.-F. Assessing the moderating roles of brand equity, intellectual capital and social capital in Chinese luxury hotels. *J. Hosp. Tour. Manag.* **2020**, *43*, 139–148, <https://doi.org/https://doi.org/10.1016/j.jhtm.2020.03.003>.
13. Liu, C.-R.; Wu, T.-C.; Yeh, P.-H.; Chen, S.-P. Equity-based customer loyalty mode for the upscale hotels-Alternative models for leisure and business travels. *Tour. Manag. Perspect.* **2015**, *16*, 139–147, <https://doi.org/10.1016/j.tmp.2015.07.017>.
14. Liu, M.T.; Wong, I.A.; Tseng, T.-H.; Chang, A.W.-Y.; Phau, I. Applying consumer-based brand equity in luxury hotel branding. *J. Bus. Res.* **2017**, *81*, 192–202, <https://doi.org/10.1016/j.jbusres.2017.06.014>.
15. Manthiou, A.; Kang, J.; Sumarjan, N.; Tang, L. The Incorporation of Consumer Experience into the Branding Process: An Investigation of Name-Brand Hotels. *Int. J. Tour. Res.* **2016**, *18*, 105–115, <https://doi.org/10.1002/jtr.2037>.
16. Mohamed A. Nassar Customer Satisfaction and Hotel Brand Equity: A Structural Equation Modelling Study. *J. Tour. Hosp. Manag.* **2017**, *5*, 144–162, <https://doi.org/10.17265/2328-2169/2017.08.002>.
17. Nam, J.; Ekinici, Y.; Whyatt, G. Brand equity, brand loyalty and consumer satisfaction. *Ann. Tour. Res.* **2011**, *38*, 1009–1030, <https://doi.org/10.1016/j.annals.2011.01.015>.
18. Oh, H.; Hsu, C.H.C. Assessing equivalence of hotel brand equity measures in cross-cultural contexts. *Int. J. Hosp. Manag.* **2014**, *36*, 156–166, <https://doi.org/10.1016/j.ijhm.2013.09.002>.
19. Rather, R.A.; Camilleri, M.A. The effects of service quality and consumer-brand value congruity on hospitality brand loyalty. *Anatolia* **2019**, *30*, 547–559, <https://doi.org/10.1080/13032917.2019.1650289>.
20. Rather, R.A.; Sharma, J. Brand Loyalty with Hospitality Brands: The Role of Customer Brand Identification, Brand Satisfaction and Brand Commitment. *Pacific Bus. Rev. Int.* **2016**, *1*, 11,

[https://papers.ssrn.com/sol3/papers.cfm?abstract\\_id=3123278](https://papers.ssrn.com/sol3/papers.cfm?abstract_id=3123278).

21. Rather, R.A.; Tehseen, S.; Parrey, S.H. Promoting customer brand engagement and brand loyalty through customer brand identification and value congruity. *Spanish J. Mark. - ESIC* **2018**, *22*, 321–341, <https://doi.org/10.1108/SJME-06-2018-0030>.
22. Šerić, M.; Gil-Saura, I.; Ruiz-Molina, M.E. How can integrated marketing communications and advanced technology influence the creation of customer-based brand equity? Evidence from the hospitality industry. *Int. J. Hosp. Manag.* **2014**, *39*, 144–156, <https://doi.org/10.1016/j.ijhm.2014.02.008>.
23. So, K.K.F.; King, C.; Sparks, B.; Wang, Y. The influence of customer brand identification on hotel brand evaluation and loyalty development. *Int. J. Hosp. Manag.* **2013**, *34*, 31–41, <https://doi.org/10.1016/j.ijhm.2013.02.002>.
24. Suhartanto, D.; Clemes, M.; Dean, D. Analyzing the Complex and Dynamic Nature of Brand Loyalty in the Hotel Industry. *Tour. Rev. Int.* **2013**, *17*, 47–61, <https://doi.org/10.3727/154427213x13649094288106>.
25. Surucu, O.; Ozturk, Y.; Okumus, F.; Bilgihan, A. Brand awareness, image, physical quality and employee behavior as building blocks of customer-based brand equity: Consequences in the hotel context. *J. Hosp. Tour. Manag.* **2019**, *40*, 114–124, <https://doi.org/10.1016/j.jhtm.2019.07.002>.
26. Wong, T.; Wickham, M. An examination of Marriott's entry into the Chinese hospitality industry: A Brand Equity perspective. *Tour. Manag.* **2015**, *48*, 439–454, <https://doi.org/https://doi.org/10.1016/j.tourman.2014.12.014>.

**Table S2.** Factors/variables<sup>1/</sup> used in word cloud visualisation.

| Factors/variables                                                                                                                                                                                                                                                                                                                                                                                                                                                                                                                                                                                                                                                                                                                                                                                                      | Number of studies |
|------------------------------------------------------------------------------------------------------------------------------------------------------------------------------------------------------------------------------------------------------------------------------------------------------------------------------------------------------------------------------------------------------------------------------------------------------------------------------------------------------------------------------------------------------------------------------------------------------------------------------------------------------------------------------------------------------------------------------------------------------------------------------------------------------------------------|-------------------|
| brand loyalty                                                                                                                                                                                                                                                                                                                                                                                                                                                                                                                                                                                                                                                                                                                                                                                                          | 26                |
| brand awareness                                                                                                                                                                                                                                                                                                                                                                                                                                                                                                                                                                                                                                                                                                                                                                                                        | 12                |
| brand equity                                                                                                                                                                                                                                                                                                                                                                                                                                                                                                                                                                                                                                                                                                                                                                                                           | 11                |
| brand image                                                                                                                                                                                                                                                                                                                                                                                                                                                                                                                                                                                                                                                                                                                                                                                                            | 10                |
| perceived quality                                                                                                                                                                                                                                                                                                                                                                                                                                                                                                                                                                                                                                                                                                                                                                                                      | 9                 |
| customer satisfaction                                                                                                                                                                                                                                                                                                                                                                                                                                                                                                                                                                                                                                                                                                                                                                                                  | 6                 |
| customer brand identification                                                                                                                                                                                                                                                                                                                                                                                                                                                                                                                                                                                                                                                                                                                                                                                          | 5                 |
| consumer based brand equity service quality brand association                                                                                                                                                                                                                                                                                                                                                                                                                                                                                                                                                                                                                                                                                                                                                          | 4                 |
| brand quality brand satisfaction brand trust                                                                                                                                                                                                                                                                                                                                                                                                                                                                                                                                                                                                                                                                                                                                                                           | 3                 |
| brand commitment, brand identification, brand reliability, brand value, customer brand engagement, perceived value, physical quality, staff behaviour price relationship equity, self-image congruence, value congruity                                                                                                                                                                                                                                                                                                                                                                                                                                                                                                                                                                                                | 2                 |
| brand identity, brand knowledge brand experience, brand performance behavioural loyalty, affective loyalty, cognitive loyalty, conative loyalty assurance, brand attitude, empathy, brand assets management trust, managerial ties, responsiveness desired organization outcomes, resources, convenience, environment, quality of commodities direct experience, service performance, staff service, tangibility intellectual capital, social capital, human capital, organization capital, information and communication technology, marketing communication, social media marketing activities internal quality, location quality, value equity, experience quality brand choice intension, revisit intention, purchase intention, and lifestyle similarity, brand love, ideal self-congruence, lifestyle congruence | 1                 |

1/ factors and/or variables determining HBL analyzed in studies included in our systematic review. These are factors/variables tested in research hypotheses mainly using confirmation factor analysis and structural equation model.
